# Supplementary material
Source: PubMed Central journal article supplement (PMC7655696)
Supplement: NIHMS1613265-supplement-1.pdf [file NIHMS1613265-supplement-1.pdf]

**Table E1. Analysis of the relation between HbA1c or a HbA1c in the prediabetes/diabetes range and asthma-related hospitalizations among 30,044 subjects who were never smokers or former smokers who smoked  $\leq 10$  pack-years †**

| Exposure                                                      | Unadjusted analysis                  | Adjusted analysis†  |
|---------------------------------------------------------------|--------------------------------------|---------------------|
|                                                               | Odds ratio (95% confidence interval) |                     |
| HbA1c (per each mmol/mol increment)                           | 1.03 (1.02, 1.04) **                 | 1.02 (1.00, 1.03) * |
| Normal HbA1c (<42 mmol/mol) (N = 28,763)                      | 1.0                                  | 1.0                 |
| Pre-diabetes/diabetes range ( $\geq 42$ mmol/mol) (N = 1,281) | 1.63 (1.27, 2.10) **                 | 1.20 (0.88, 1.63)   |

† Models adjusting for age, sex, ethnicity, body mass index, smoking status, total annual household income, fasting time, and C-reactive protein level.

\*  $P < 0.05$ , \*\* $P < 0.01$
